# Supplementary material
Source: publisher figshare collection journal article supplement (https://acs.figshare.com/ndownloader/files/28413748)
Supplement: Supplementary file 1 [file 28413748]

## **Supporting Information**

### **WO<sub>3</sub> Nanoflakes Coupled with Hexagonal Boron Nitride Nanosheets for Triethylamine Sensing**

Wendi Tian<sup>†</sup>, Yan Wang<sup>†\*</sup>, Yan Zhang<sup>†</sup>, Jianliang Cao<sup>†</sup>, Rong-Feng Guan<sup>‡\*\*</sup>

<sup>†</sup>State Collaborative Innovation Center of Coal Work Safety and Clean-efficiency Utilization,  
Henan Polytechnic University, Jiaozuo 454000, China

<sup>‡</sup>Key Laboratory for Advanced Technology in Environmental Protection of Jiangsu Province,  
Yancheng Institute of Technology, yancheng, 224051, China

\*Corresponding author: Prof. Yan Wang, yanwang@hpu.edu.cn

\*\*Corresponding author: Prof. Rong-Feng Guan, rongfengg@163.com

**Table S1. The proportion and position of O species in WO<sub>3</sub> and WO<sub>3</sub>/*h*-BN-5 nanocomposite.**

| <b>O species</b>     | <b>WO<sub>3</sub></b> | <b>position (eV)</b> | <b>WO<sub>3</sub>/<i>h</i>-BN-5</b> | <b>position (eV)</b> |
|----------------------|-----------------------|----------------------|-------------------------------------|----------------------|
| <b>O<sub>L</sub></b> | 75.6%                 | 530.12               | 67.2%                               | 529.83               |
| <b>O<sub>V</sub></b> | 24.3%                 | 531.01               | 26.3%                               | 531.65               |
| <b>O<sub>C</sub></b> | -                     | -                    | 6.4%                                | 533.16               |

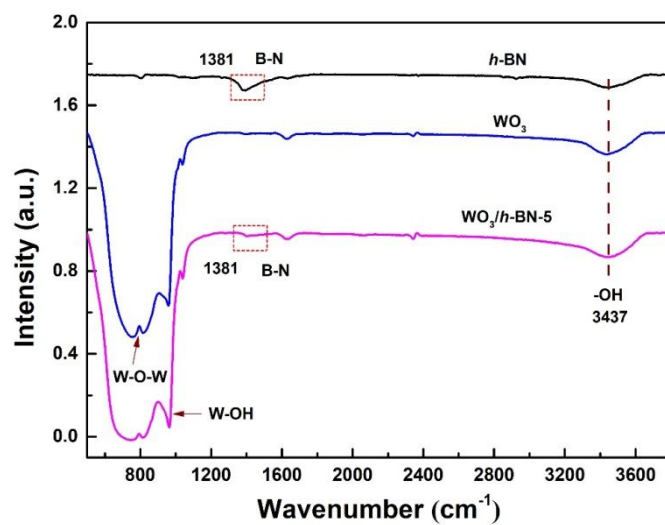

Fig. S1. FT-IR spectrum of single *h*-BN,  $\text{WO}_3$  and the  $\text{WO}_3/h\text{-BN-5}$  hybrid.

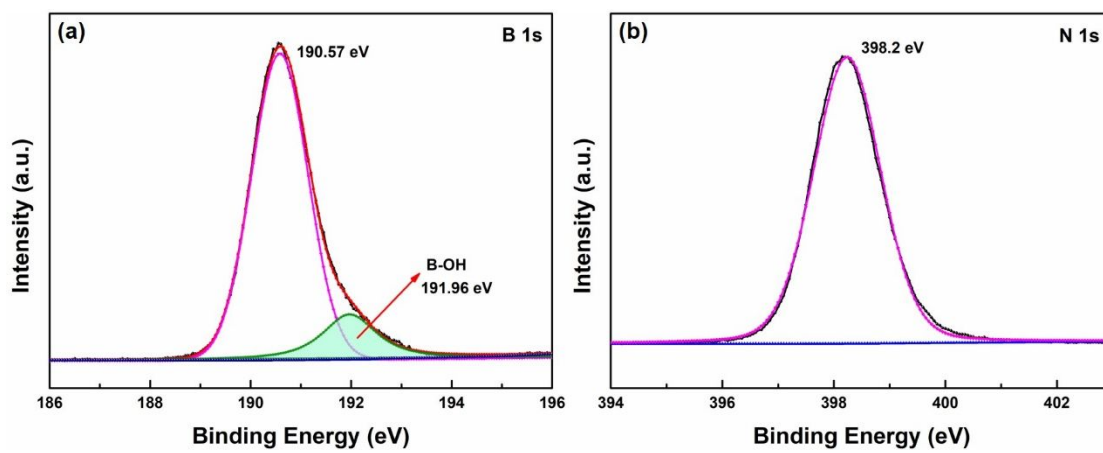

Fig. S2. XPS analysis of B 1s element (a) and N 1s element (b).

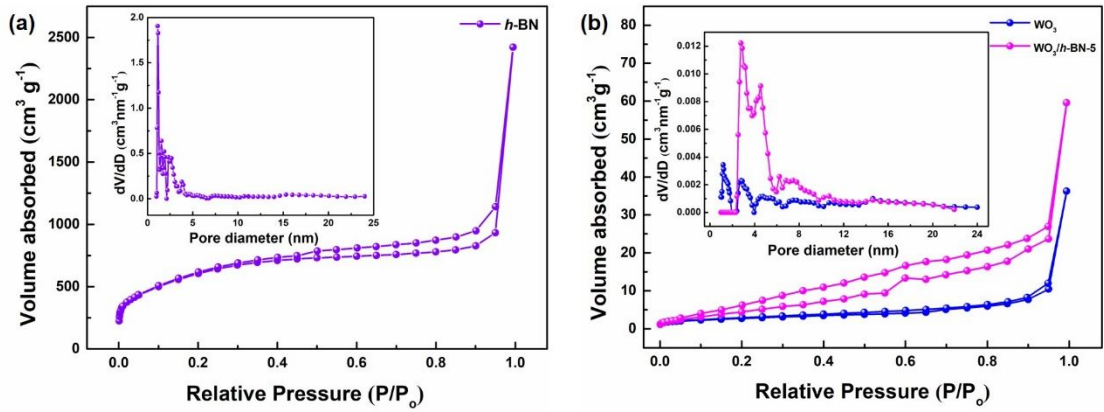

Fig. S3. N<sub>2</sub> adsorption-desorption isotherm and BJH pore size distribution (insert) of *h*-BN (a) and pure WO<sub>3</sub>, WO<sub>3</sub>/*h*-BN-5 (b).

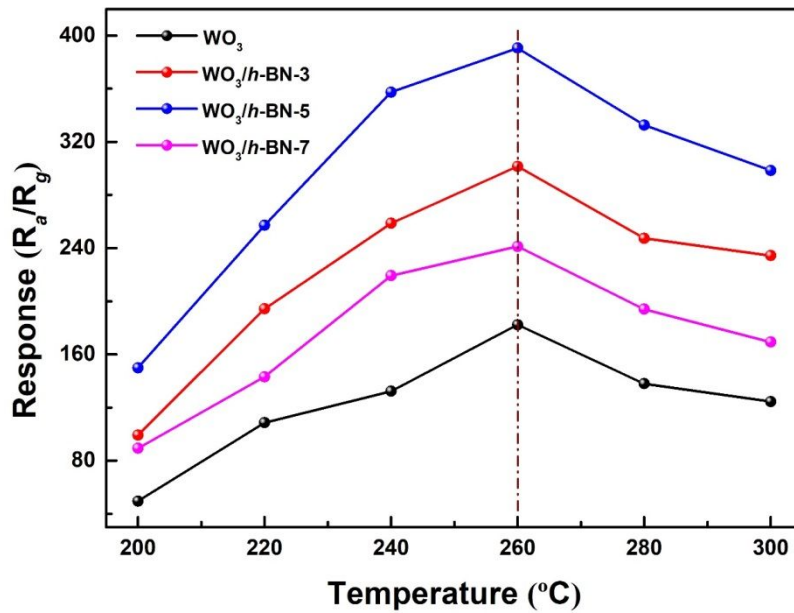

Fig. S4. Temperature-dependent responses of the sensors based on different samples.

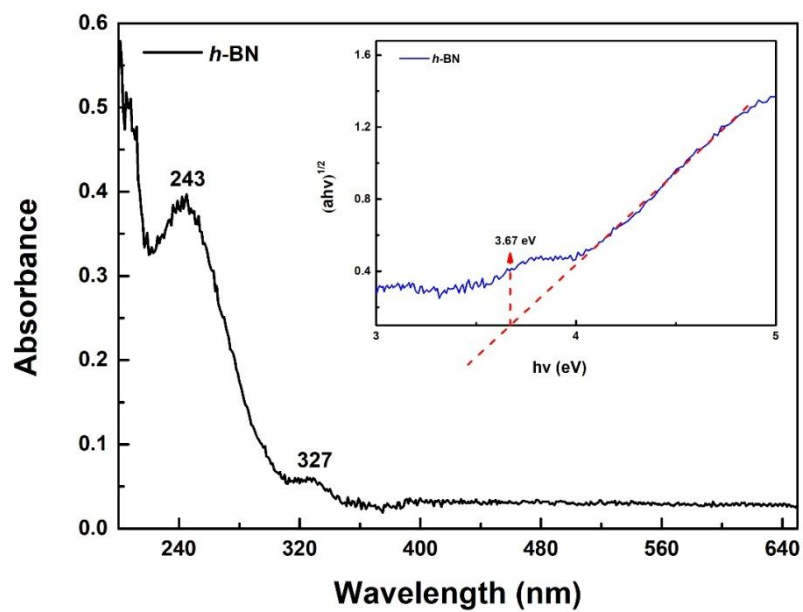

Fig. S5. The UV-vis DRS and  $(\alpha h\nu)^{1/2}$ - $h\nu$  plot (inset) of single *h*-BN.
